# Supplementary material
Source: Copernicus journal article supplement (doi:10.5194/egusphere-2026-3136)
Supplement: Supplementary file 1 [file egusphere-2026-3136-supplement.pdf]

1 *Supplementary Information for*

2 **Impacts of South Asian aerosol inflow over Mount**  
3 **Qomolangma on downstream cloud–precipitation processes**  
4 **through a long-range ice-crystal “seeding” effect**

5  
6 Xiangde Xu<sup>1, a</sup>, Wenyue Cai<sup>1, a</sup>, Tianliang Zhao<sup>2</sup>, Changjun Yang<sup>3</sup>, Kai Meng<sup>4</sup>, Chong Wu<sup>1</sup>, Na  
7 Dong<sup>1, 5</sup>, Yueqing Li<sup>6</sup>, Shunjiu Wang<sup>6</sup>, Wenqing Liu<sup>7</sup>, Tianshu Zhang<sup>7</sup>, Ga Zhuo<sup>8</sup>, Shengjun  
8 Zhang<sup>1</sup>, Bin Chen<sup>1</sup>, Chunsong Lu<sup>2</sup>, Jinghua Chen<sup>2</sup>, Kai Yang<sup>2</sup>, Jianming Xu<sup>9</sup>

9  
10 <sup>1</sup> State Key Laboratory of Severe Weather Meteorological Science and Technology, Chinese  
11 Academy of Meteorological Sciences, Beijing 100081, China

12 <sup>2</sup> Key Laboratory for Aerosol-Cloud-Precipitation of China Meteorological Administration,  
13 Nanjing University of Information Science and Technology, Nanjing, Jiangsu Province, 210044,,  
14 China

15 <sup>3</sup> Key Laboratory of Radiometric Calibration and Validation for Environmental Satellites,  
16 National Satellite Meteorological Center (National Centre for Space Weather), China  
17 Meteorological Administration, Beijing 100081, China

18 <sup>4</sup> Hebei Key Laboratory of Meteorology and Modern Economy, Hebei Provincial Institute of  
19 Meteorological Sciences, Shijiazhuang 050021, China

20 <sup>5</sup> Department of Atmospheric and Oceanic Sciences & Institute of Atmospheric Sciences, Fudan  
21 University, Shanghai, 200438, China

22 <sup>6</sup> Heavy Rain and Drought-Flood Disaster in Plateau and Basin Key Laboratory of Sichuan  
23 Province, Chengdu Institute of Plateau Meteorology, China Meteorological Administration,  
24 Chengdu 610072, China

25 <sup>7</sup> Key Laboratory of Environment Optics and Technology, Anhui Institute of Optics and Fine  
26 Mechanics, Chinese Academy of Sciences, Hefei 230031, China

27 <sup>8</sup> Mêdog National Climate Observatory, Mêdog, 860700, China

28 <sup>9</sup> Shanghai Meteorological Center, Shanghai Meteorological Service, Shanghai 200030, China

29

30 <sup>a</sup> These authors contributed equally to this work as co-first authors.

31 Corresponding authors: Wenyue Cai (caiwy@cma.gov.cn), TianLiang Zhao (tlzhao@nuist.edu.cn)

32

33 **This file includes:**

34 Figure S1 and Table S1

35

36

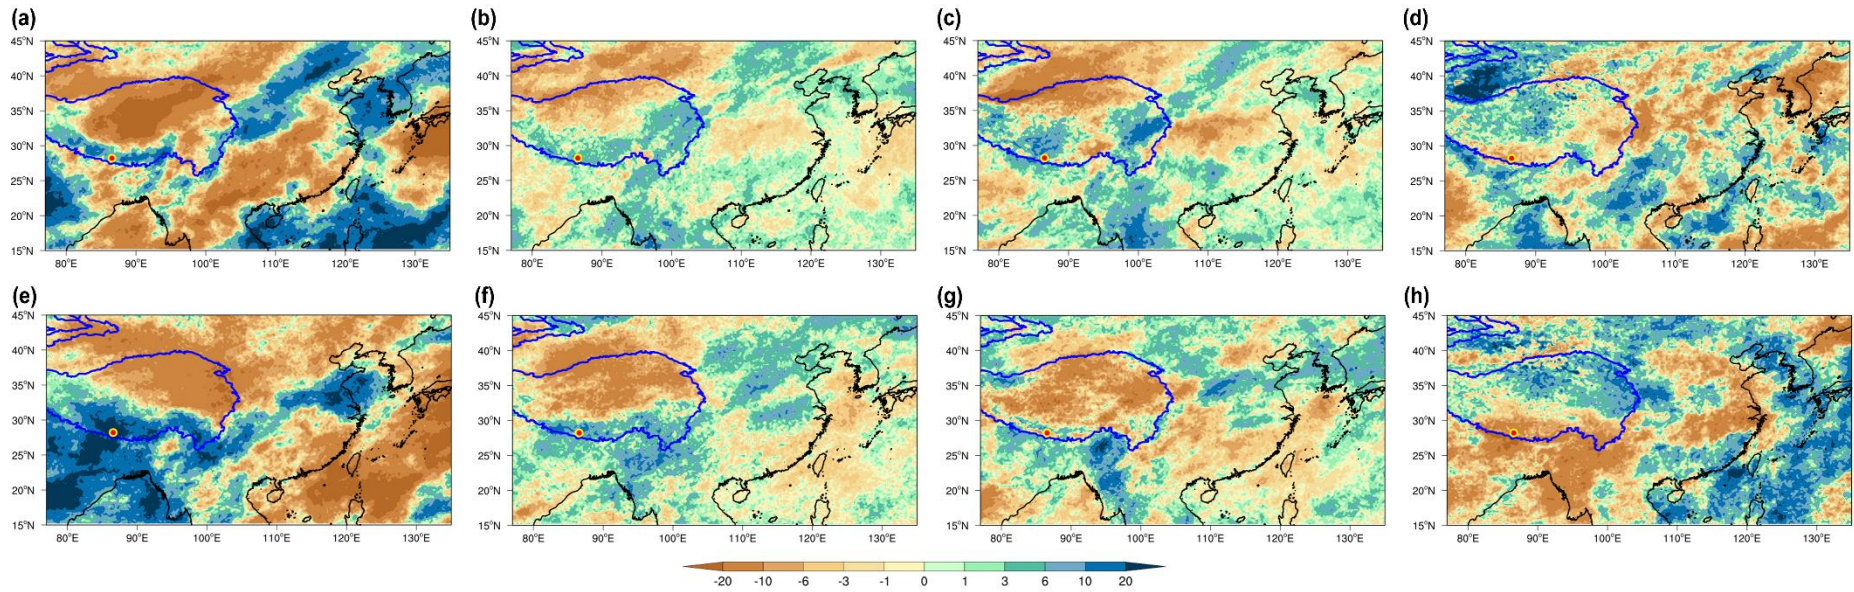

37

38 **Figure S1.** National-scale cloud-phase anomalies associated with aerosol loading: (a–d) Spatial distributions of national-scale cloud-phase anomalies under high- versus  
39 low-aerosol-loading conditions during July 2018 — (a) ice phase, (b) mixed phase, (c) supercooled liquid phase, (d) liquid phase; (e–h) Same as (a–d), but for July  
40 2019.

41 **Table S1.** High-concentration aerosol processes with the daily averages of  $AEC \geq 0.025 \text{ km}^{-1}$  on  
42 the MQ in July 2018 and July 2019, and the remaining periods are identified as low-concentration  
43 aerosol processes, which are not listed in this Table ([Xu et al., 2025](#)).

| Process   | Starting Date | Ending Date  |
|-----------|---------------|--------------|
| Process 1 | 9 Jul, 2018   | 12 Jul, 2018 |
| Process 2 | 15 Jul, 2018  | 16 Jul, 2018 |
| Process 3 | 21 Jul, 2018  | 25 Jul, 2018 |
| Process 4 | 8 Jul, 2019   | 9 Jul, 2019  |
| Process 5 | 12 Jul, 2019  | 13 Jul, 2019 |
| Process 6 | 23 Jul, 2019  | 26 Jul, 2019 |
| Process 7 | 28 Jul, 2019  | 30 Jul, 2019 |

44
